# Supplementary material
Source: PubMed Central journal article supplement (PMC5340341)
Supplement: 1319FigureS1.pdf [file 1319FigureS1.pdf]

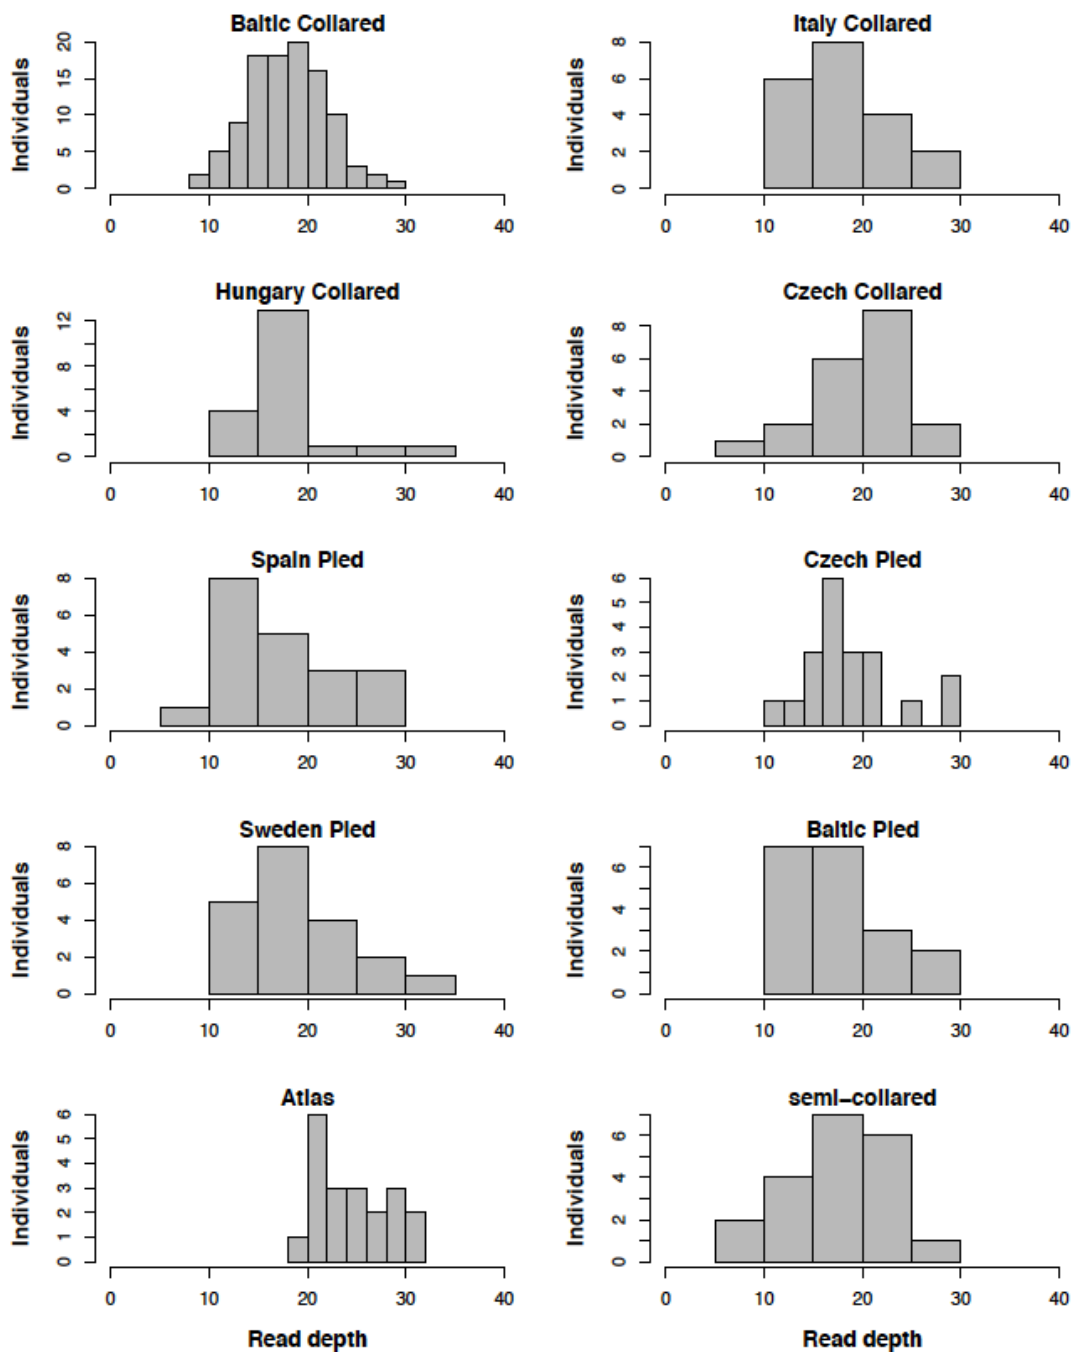

**Figure S1.** Histograms of mean sequencing read depth at SNP positions across individuals in each of the study populations. Mean read depth was calculated for each individual in each population after filtering the SNPs as described in the main text.
