# Supplementary material
Source: PubMed Central journal article supplement (PMC5340341)
Supplement: 1319FigureS3.pdf [file 1319FigureS3.pdf]

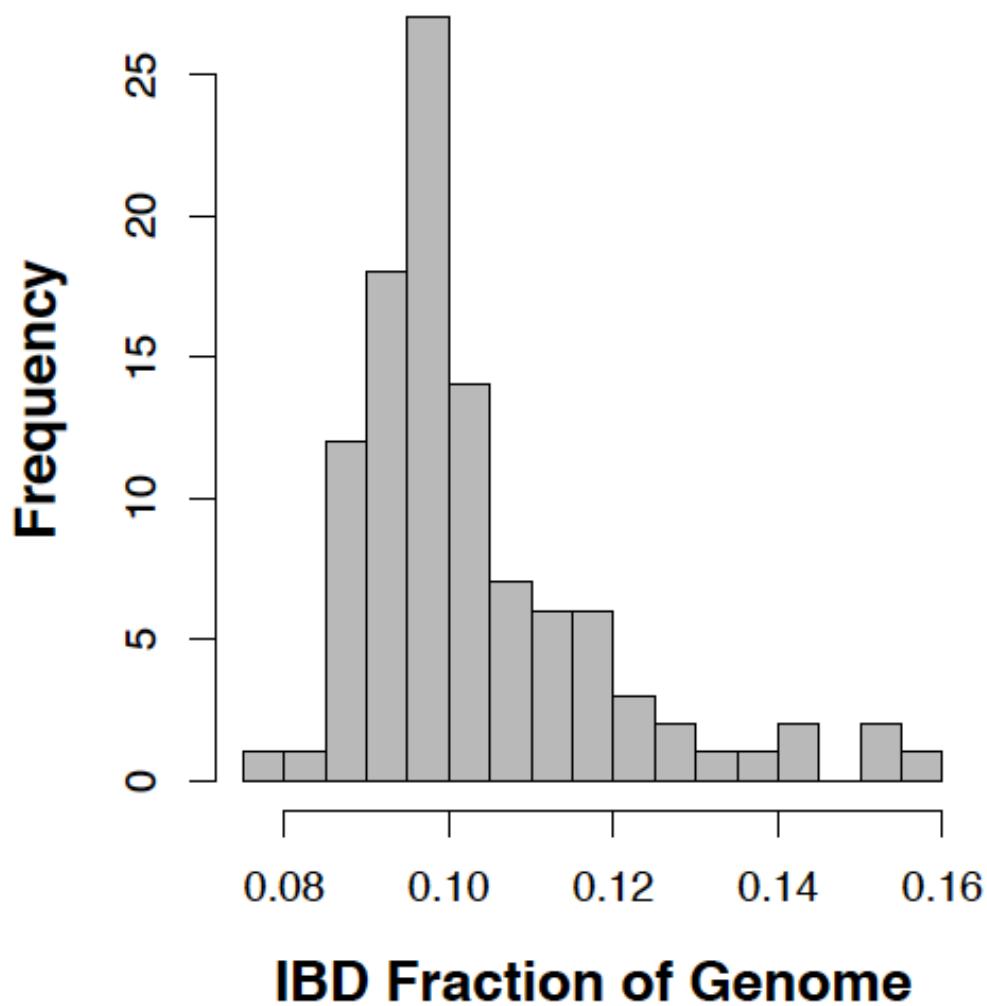

**Figure S3.** Distribution of the IBD fraction of the genome in 104 Baltic collared flycatchers. The IBD genome fractions were calculated for each individual by summing the physical lengths of all detected IBD segments and dividing by the physical length of the genome assembly.
