# Supplementary material
Source: PubMed Central journal article supplement (PMC5340341)
Supplement: 1319FigureS4.pdf [file 1319FigureS4.pdf]

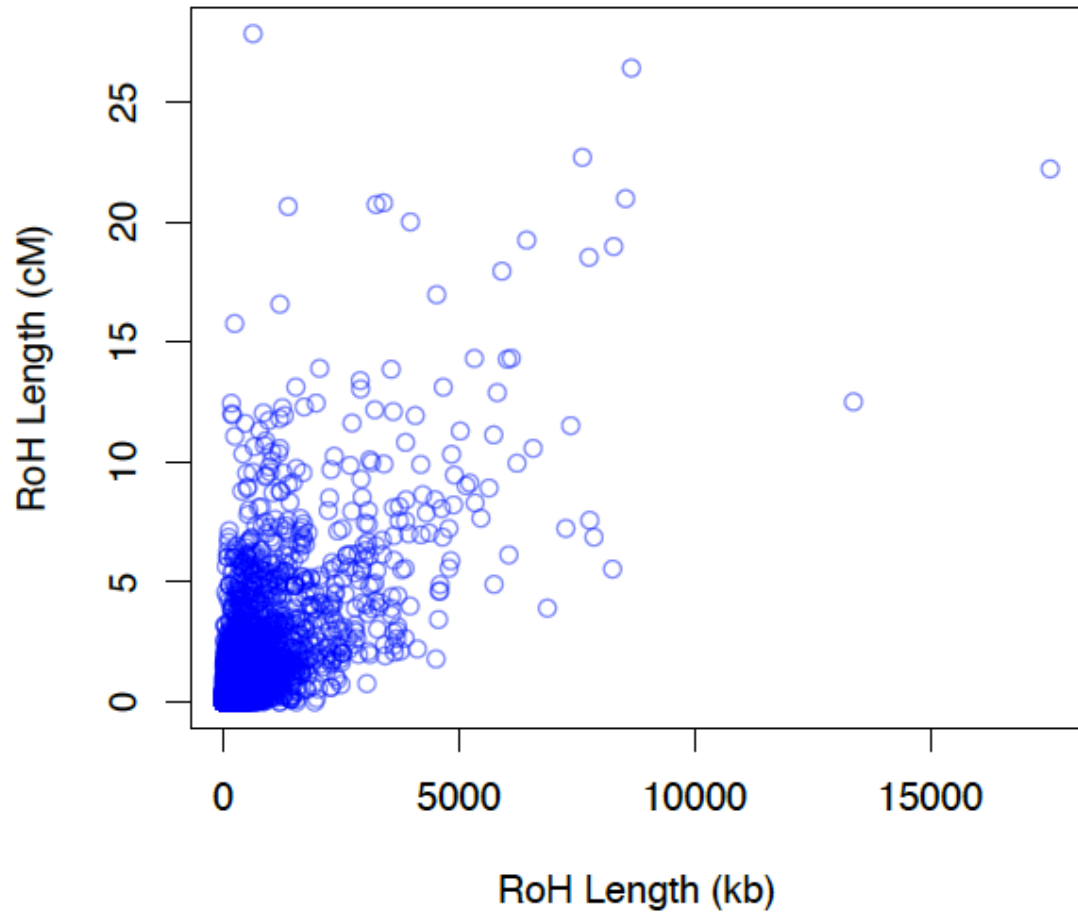

**Figure S4.** The relationship between the genetic and physical lengths of IBD segments in 104 Baltic collared flycatchers.
