# Supplementary material
Source: PubMed Central journal article supplement (PMC5340341)
Supplement: 1319FigureS5.pdf [file 1319FigureS5.pdf]

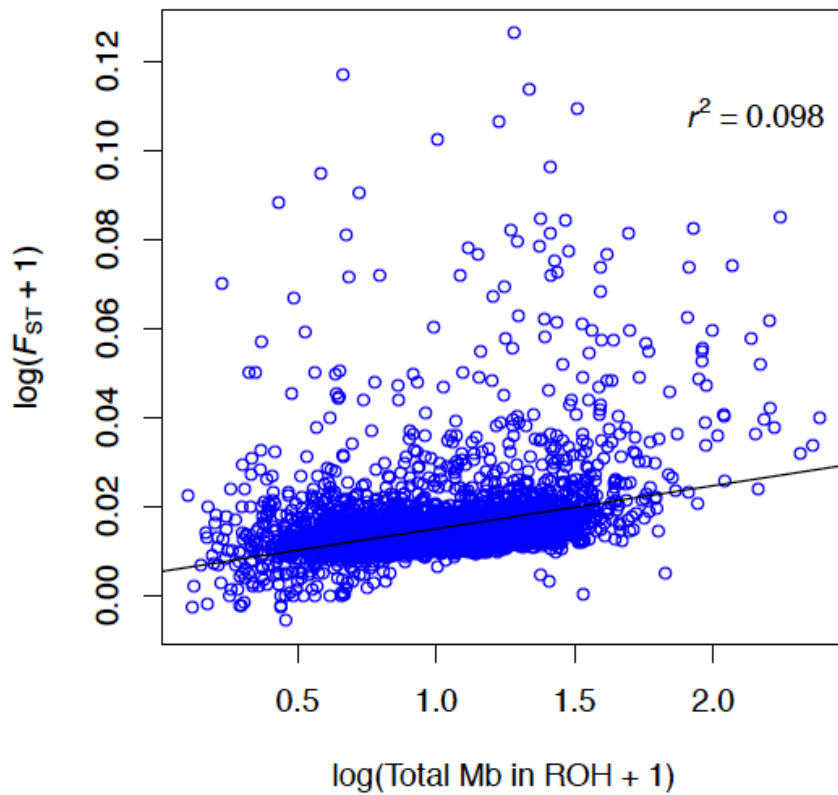

**Figure S5.** Relationship between  $F_{ST}$  and the abundance of ROH.  $F_{ST}$  and ROH abundance were each measured in non-overlapping 200 kb windows.  $F_{ST}$  (Weir & Cockerham 1984) was estimated between the Czech collared flycatchers and the Czech pied flycatchers. ROH abundance was measured in the Baltic collared flycatchers.
