# Supplementary material
Source: PubMed Central journal article supplement (PMC5340341)
Supplement: 1319FigureS6.pdf [file 1319FigureS6.pdf]

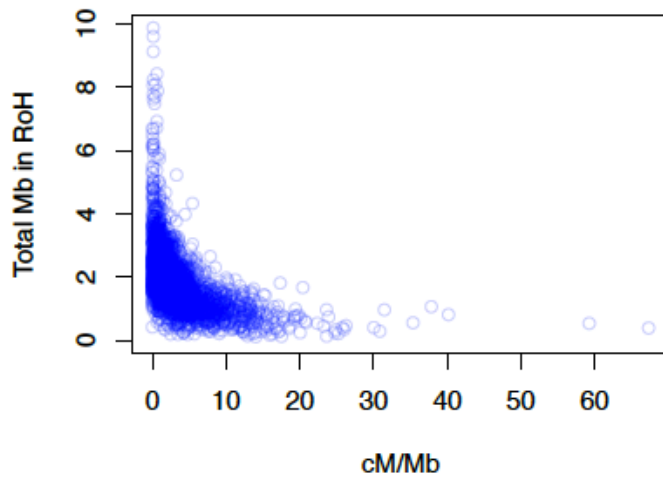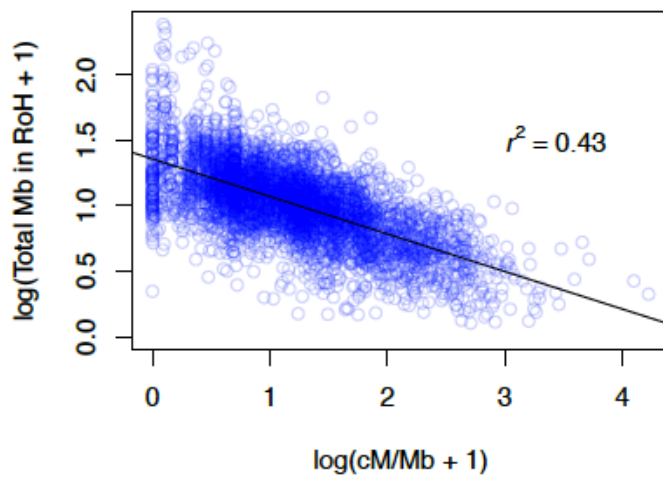

**Figure S6.** The relationship between the abundance of ROH and the recombination rate among 104 Baltic collared flycatchers. Each point represents the abundance of ROH in 200 kb windows across the collared flycatcher autosomes. Each variable is log transformed in the lower panel. The fitted line and  $r^2$  in the lower panel are from a least squares linear regression.
