# Supplementary material
Source: PubMed Central journal article supplement (PMC5340341)
Supplement: 1319FigureS9.pdf [file 1319FigureS9.pdf]

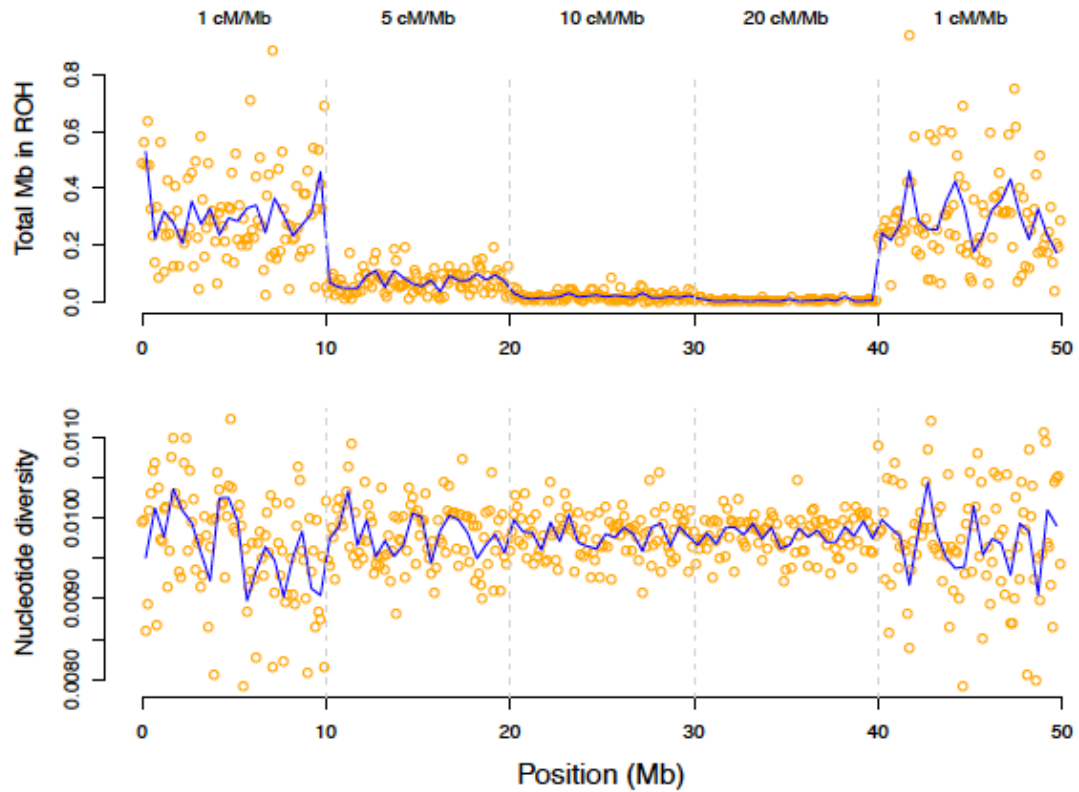

**Figure S9** Effect of recombination rate on the detection of ROH in a simulated population. The recombination rate for each 10 Mb chromosome block is given at the top. The upper panel shows the density of ROH in non-overlapping 100 kb windows plotted against physical position (in Mb) on the chromosome. The bottom panel shows nucleotide diversity plotted against physical position in the same 100 kb windows. More ROH are detected in low recombination regions despite no systematic effect of recombination rate on nucleotide diversity and heterozygosity (Figure 7, main text).
