# Supplementary material
Source: PubMed Central journal article supplement (PMC5340341)
Supplement: 1319FigureS10.pdf [file 1319FigureS10.pdf]

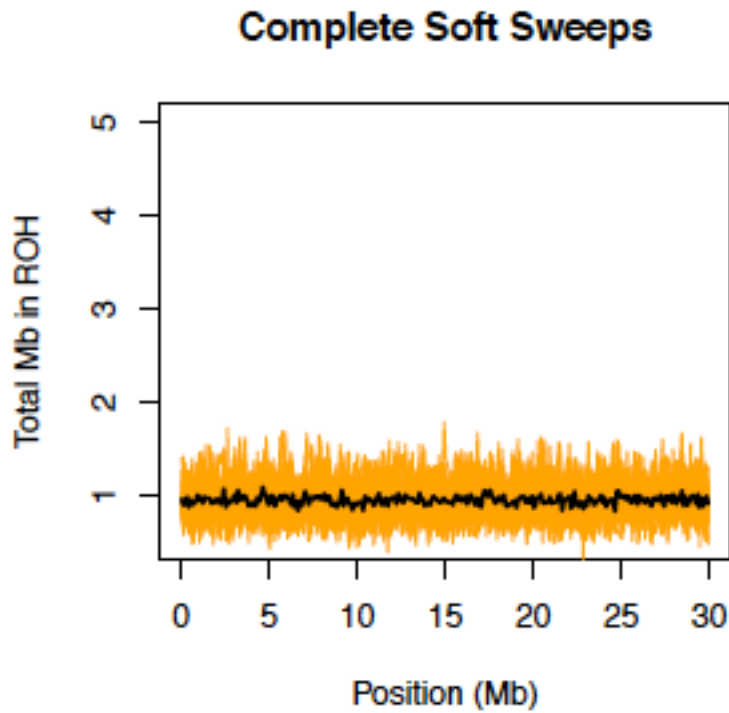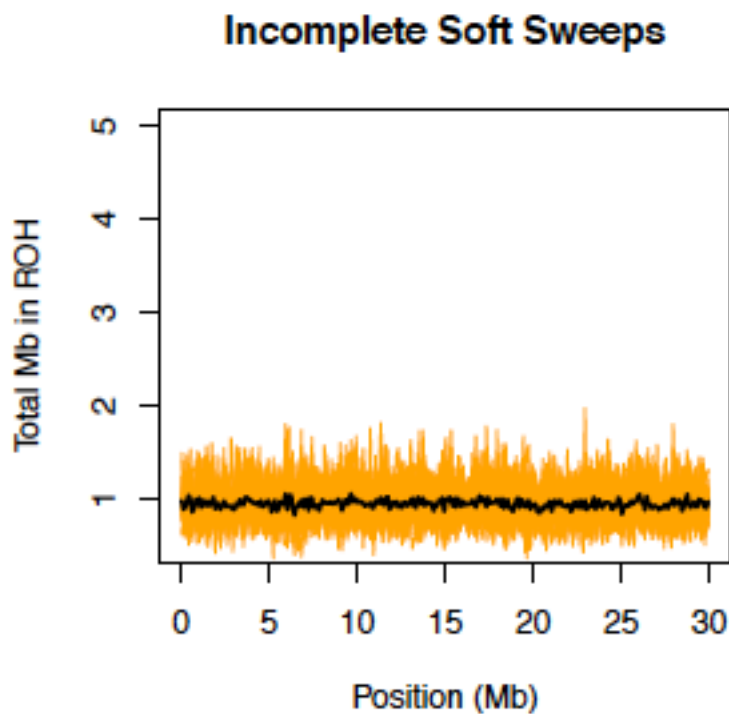

**Figure S10.** Effects of soft selective sweeps on the abundance of ROH. Results from simulations of complete selective sweeps are shown in the top panel, and results from incomplete selective sweeps are in the lower panel. The orange lines represent the total Mb in ROH in 100 kb windows for each of 20 replicate simulations. The black links represent the mean Mb in ROH across all simulation repetitions in the same 100 kb windows.
